# Supplementary material for: A homozygous MED11 C-terminal variant causes a lethal neurodegenerative disease
Source: PubMed Central journal article supplement (PMC10519206; doi:10.1016/j.gim.2022.07.013), 2022-10
Supplement: mmc3.pdf [file mmc3.pdf]

-  Frequent(>75%)
-  Variable(25-75%)
-  Rare(<25%)

|                             | Head module |          |          | Middle module | Tail module |          | Kinase module |          |          |          |          |          |
|-----------------------------|-------------|----------|----------|---------------|-------------|----------|---------------|----------|----------|----------|----------|----------|
|                             | MED11       | MED17    | MED20    | MED25         | MED23       | MED27    | CDK8          | CDK19    | MED12    | MED12L   | MED13    | MED13L   |
| GDD/ID                      | Frequent    | Frequent | Frequent | Frequent      | Frequent    | Frequent | Frequent      | Frequent | Frequent | Frequent | Frequent | Frequent |
| MICROCEPHALY                | Frequent    | Frequent | Variable | Rare          | Rare        | Variable |               | Rare     | Rare     |          | Rare     | Rare     |
| SEIZURES                    | Frequent    | Frequent |          | Variable      | Variable    | Variable | Rare          | Variable | Rare     | Variable | Rare     | Rare     |
| SPASTICITY                  | Variable    | Frequent | Frequent | Rare          | Frequent    | Variable |               |          |          |          |          |          |
| HYPOTONIA                   | Frequent    | Variable |          | Variable      | Frequent    | Variable | Frequent      | Frequent | Variable | Variable | Rare     | Variable |
| DYSTONIA                    |             | Rare     | Frequent |               | Rare        | Variable |               |          |          |          |          |          |
| ATAXIC GAIT                 |             | Rare     |          |               | Variable    | Variable |               |          |          |          |          |          |
| BEHAVIOURAL ABNORMALITIES   |             |          |          |               |             |          | Variable      | Variable | Frequent | Frequent | Variable | Rare     |
| CEREBRAL ATROPHY            | Frequent    | Frequent | Frequent | Rare          |             |          |               | Rare     |          |          | Rare     |          |
| CEREBELLAR ATROPHY          | Frequent    | Frequent | Frequent |               |             | Variable |               |          | Variable |          |          |          |
| BASAL GANGLIA ABNORMALITIES | Rare        | Rare     | Frequent |               |             | Variable |               |          | Variable |          |          |          |
| POOR MYELINATION            | Frequent    | Frequent |          |               | Variable    |          |               | Variable |          |          |          | Rare     |
| THIN CORPUS CALLOSUM        |             | Frequent | Frequent | Variable      | Variable    | Variable | Variable      | Rare     | Variable | Variable |          | Rare     |
| BILATERAL CATARACT          | Variable    |          | Variable | Rare          |             | Frequent |               |          |          | Rare     |          |          |
| DYSMORPHIC FEATURES         | Frequent    |          |          | Frequent      |             | Variable | Frequent      | Frequent | Variable | Variable | Variable | Frequent |
| HEARING LOSS                | Frequent    |          |          | Rare          |             | Variable | Variable      |          | Variable |          | Rare     | Rare     |
| MACROCEPHALY                |             |          |          |               |             |          |               | Variable |          |          |          | Rare     |
| CARDIAC DEFECTS             | Variable    |          |          | Variable      | Frequent    |          | Variable      |          | Frequent | Variable | Rare     | Variable |
